# Supplementary material for: Assessment of the Environmental Impact of a Car Tire throughout Its Lifecycle Using the LCA Method
Source: MDPI journal article supplement (doi:10.3390/ma12244177), 2019-12-12
Supplement: s1 [file s1]

Supplementary

# Assessment of the Environmental Impact of a Car Tire throughout Its Lifecycle Using the LCA Method

Katarzyna Piotrowska <sup>1</sup>, Weronika Kruszelnicka <sup>2,\*</sup>, Patrycja Bałdowska-Witos <sup>2</sup>, Robert Kasner <sup>2</sup>, Jacek Rudnicki <sup>3</sup>, Andrzej Tomporowski <sup>2</sup>, Józef Flizikowski <sup>2</sup> and Marek Opielak <sup>1</sup>

<sup>1</sup> Faculty of Mechanical Engineering, Lublin University of Technology, 20-618 Lublin, Poland;

k.piotrowska@pollub.pl (K.P.); m.opielak@pollub.pl (M.O.)

<sup>2</sup> Department of Technical Systems Engineering, Faculty of Mechanical Engineering, University of Science and Technology in Bydgoszcz, 85-796 Bydgoszcz, Poland; patrycja.baldowska-witos@utp.edu.pl (P.B.-W.); robert.kasner@gmail.com (R.K.); a.tomporowski@utp.edu.pl (A.T.); fliz@utp.edu.pl (J.F.)

<sup>3</sup> Faculty of Ocean Engineering And Ship Technology, Gdańsk University of Technology, 80-980 Gdańsk, Poland; jacekrud@pg.edu.pl

\* Correspondence: weronika.kruszelnicka@utp.edu.pl

Received: 23 September 2019; Accepted: 10 December 2019; Published: date

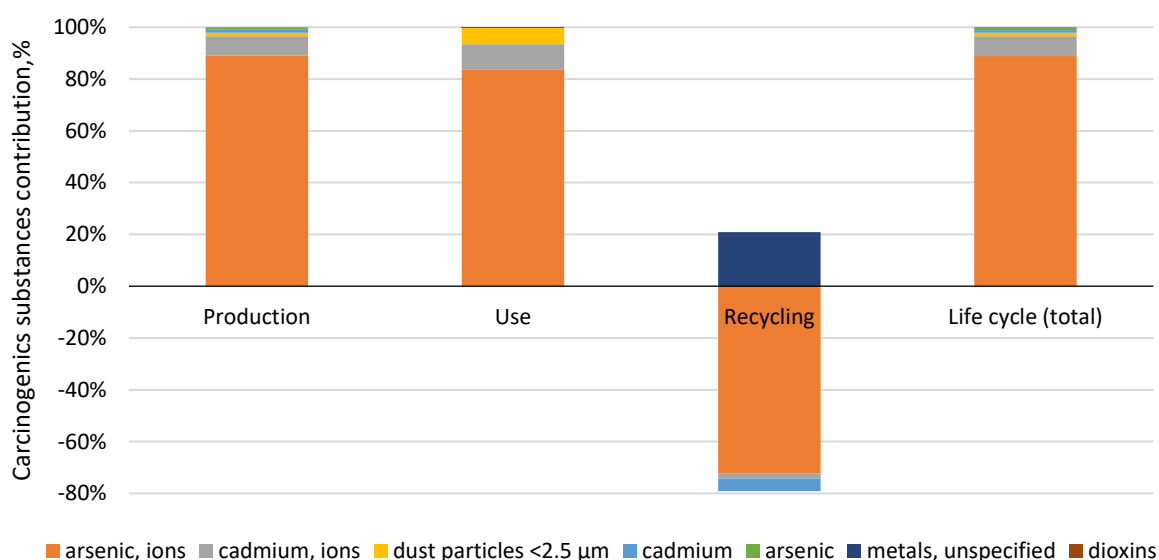

**Figure S1.** Carcinogenic substances contribution in the impact category “carcinogens” in the life cycle stages of a car tire.

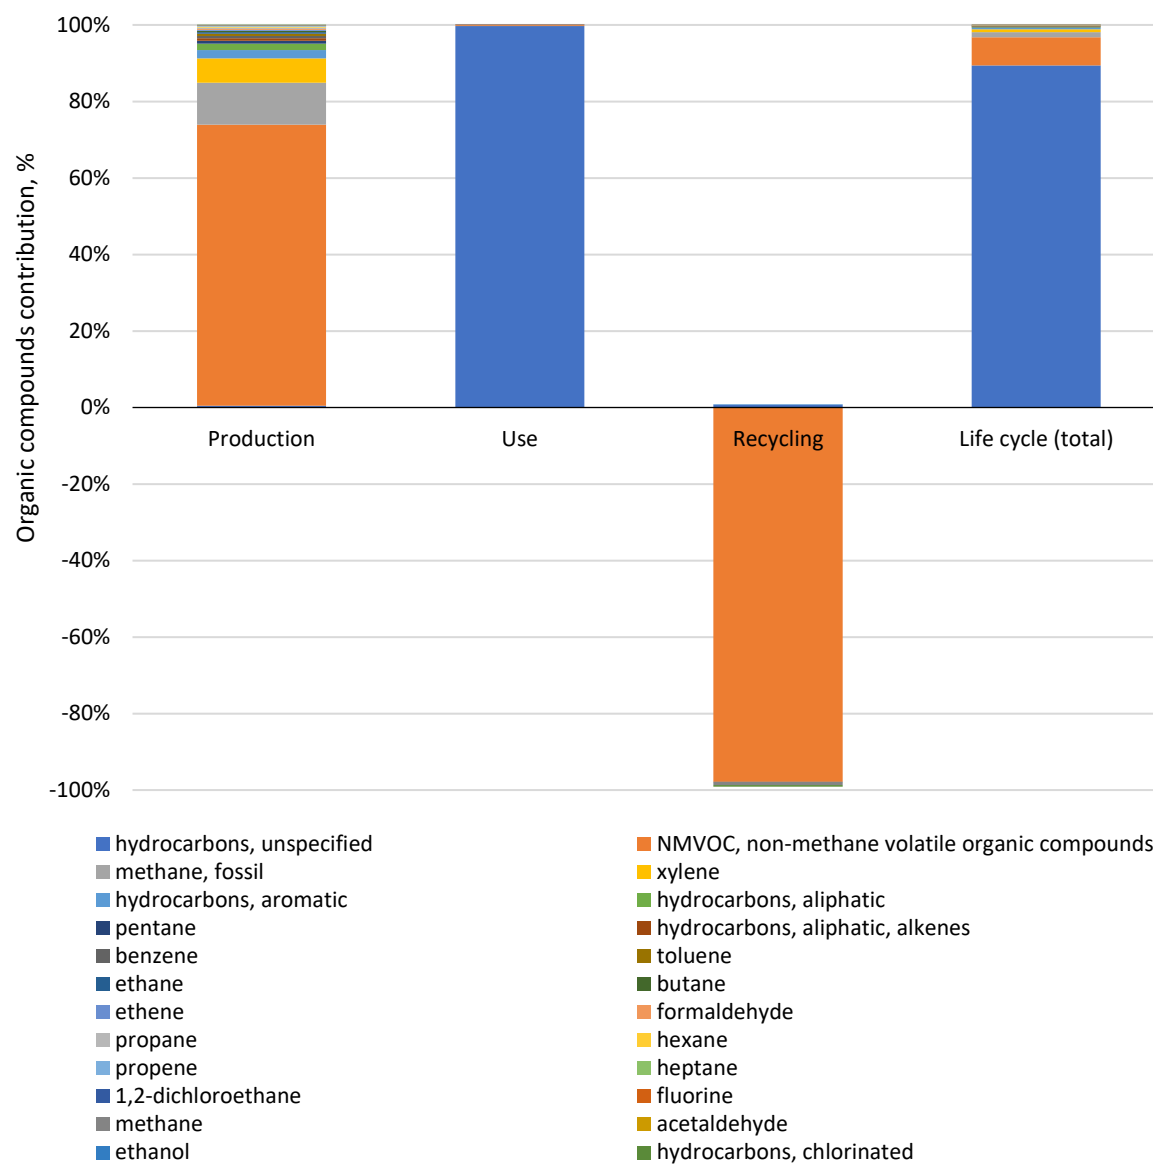

**Figure S2.** Organic substances contribution in the impact category “respiratory organics” in the life cycle stages of a car tire.

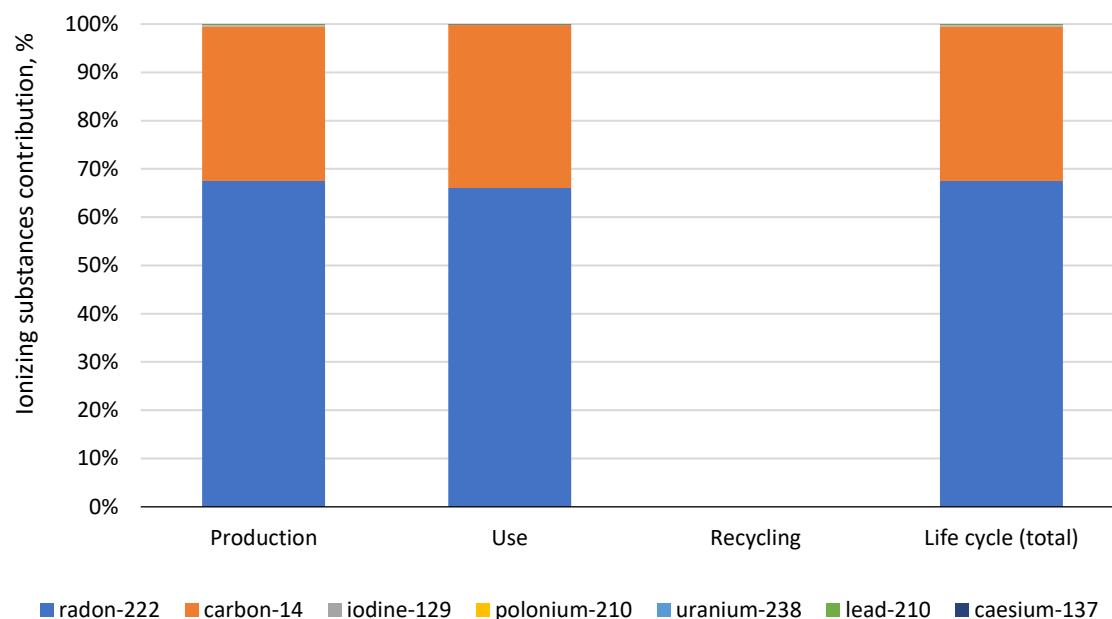

**Figure S3.** Ionizing substances contribution in the impact category "radiation" in the life cycle stages of a car tire.

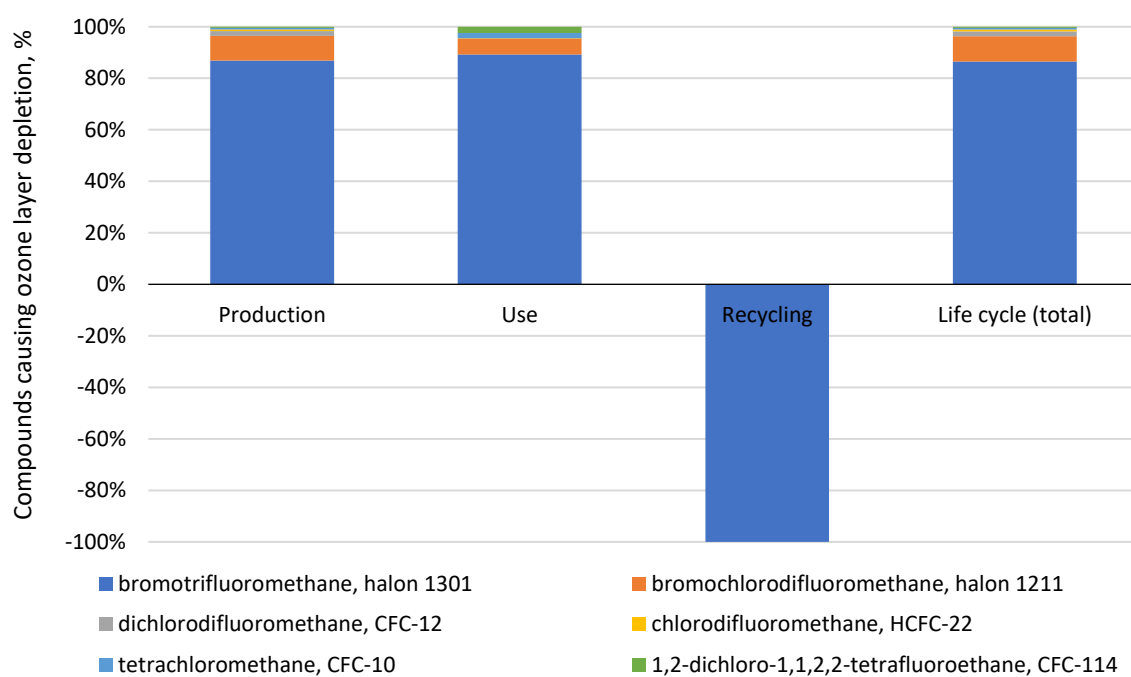

**Figure S4.** Compounds causing ozone layer depletion contribution in the impact category "ozone layer" in the life cycle stages of a car tire.

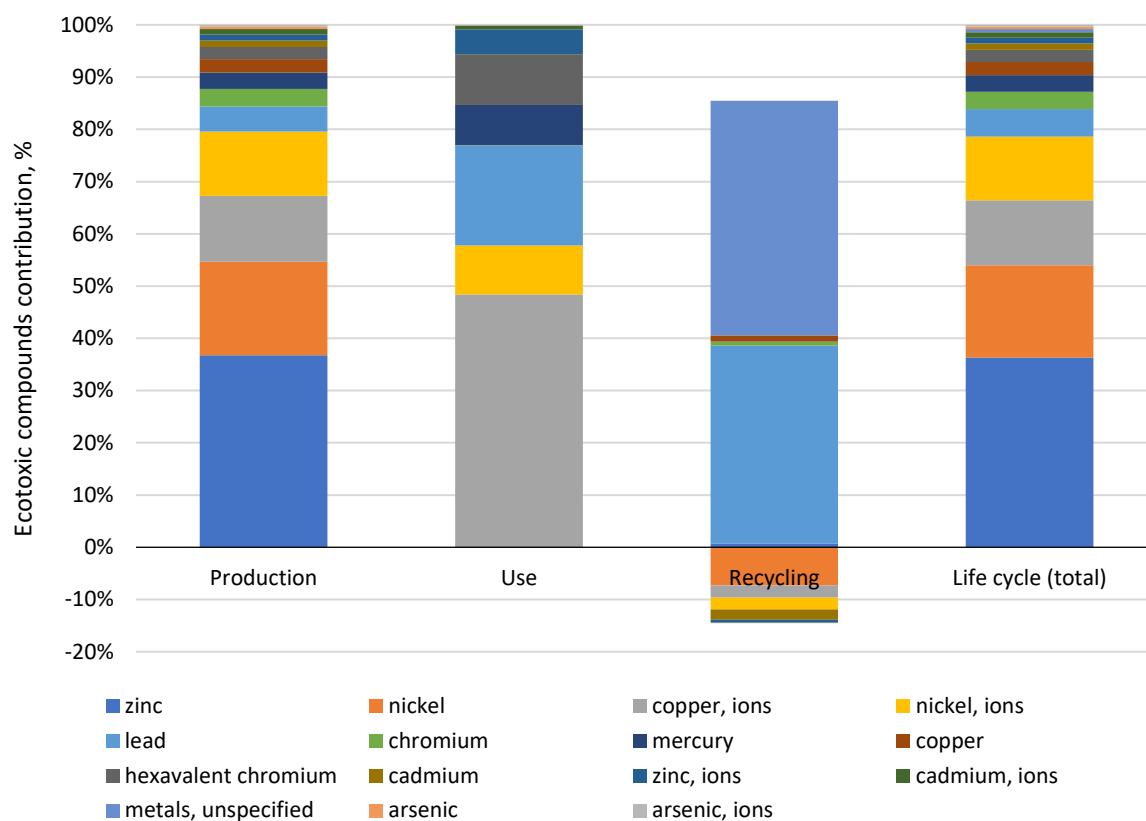

**Figure S5.** Ecotoxic compounds contribution in the impact category "ecotoxicity" in the life cycle stages of a car tire.

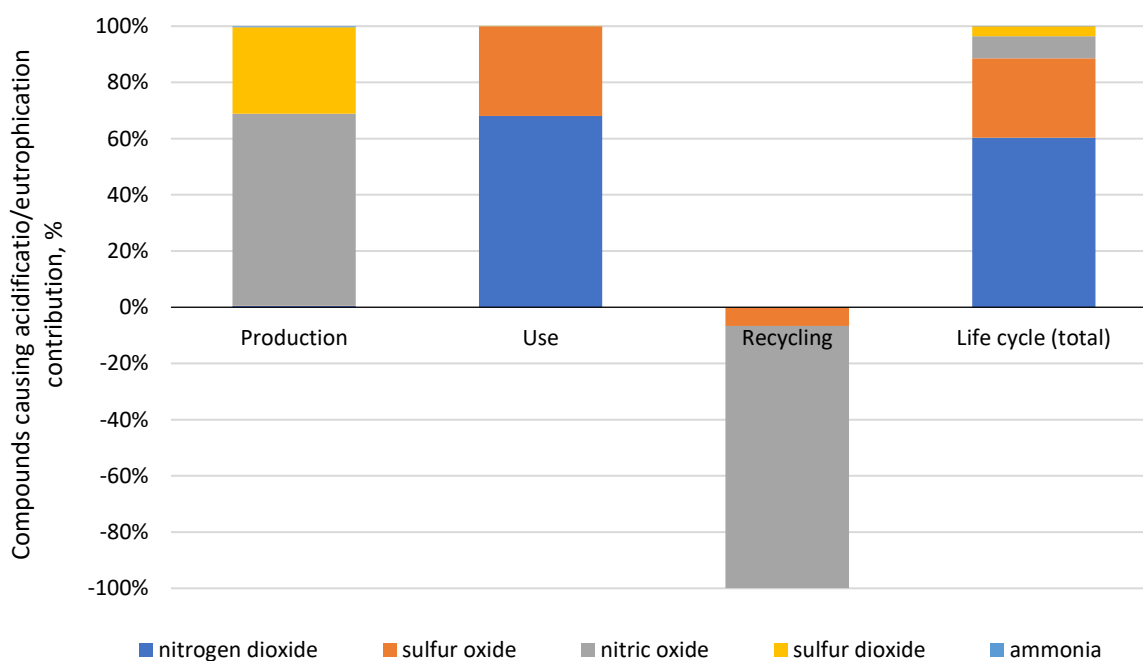

**Figure S6.** Compounds causing acidification/eutrophication contribution in the impact category "acidification/eutrophication" in the life cycle stages of a car tire.

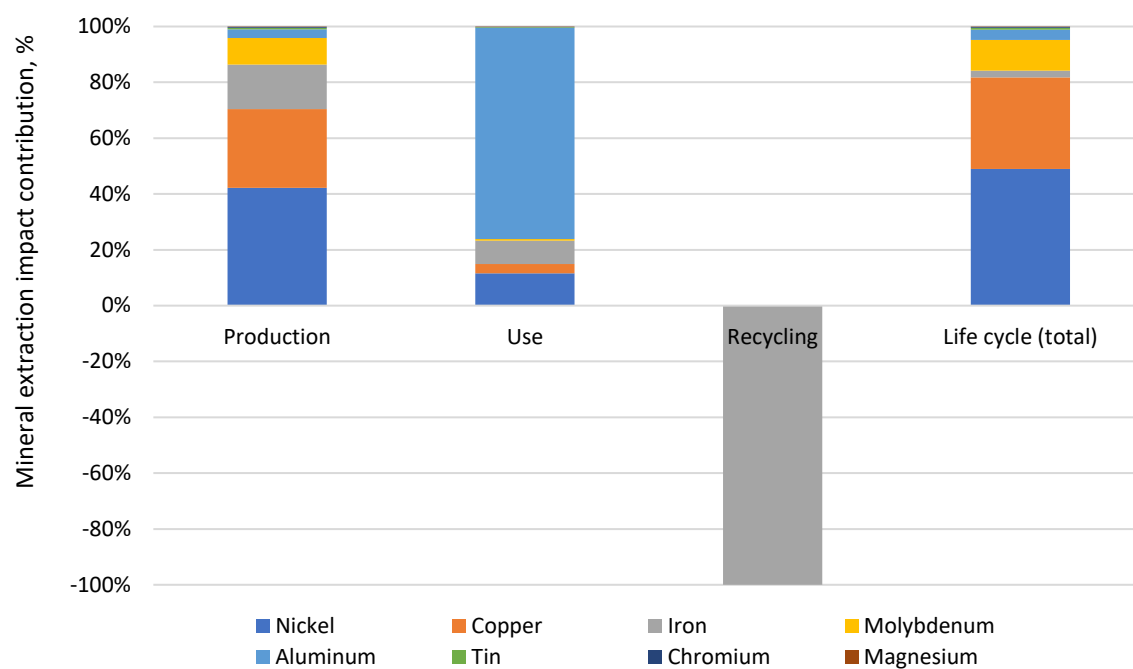

**Figure S7.** Minerals extraction contribution in the impact category “minerals” in the life cycle stages of a car tire.

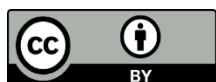

© 2019 by the authors. Submitted for possible open access publication under the terms and conditions of the Creative Commons Attribution (CC BY) license (<http://creativecommons.org/licenses/by/4.0/>).
